# Supplementary material for: Predictors of HIV rebound differ by timing of antiretroviral therapy initiation
Source: PubMed Central journal article supplement (PMC10967395; doi:10.1172/jci.insight.173864), 2024-02-08
Supplement: jciinsight-9-173864-s270.pdf [file jciinsight-9-173864-s270.pdf]

## **Viral and Immune Predictors of HIV Rebound after ART Interruption**

### **SUPPLEMENTAL MATERIALS**

#### **Current A5423 Team Members**

CSS Representative: Elizabeth Barr

National Institutes of Health, Office of the Director, Office of Research on Women's Health

Clinical Trials Specialist: Katharine Bergstrom

ACTG Network Coordinating Center

Consultant: Jake Estes

Oregon National Primate Research Center

Consultant: Bonnie Howell

Merck Research Laboratories

DAIDS Medical Officer: Lawrence Fox

DAIDS/NIAID/NIH/HIVRB

DAIDS Protocol Pharmacist: Oladapo Alli

Pharmaceutical Affairs Branch

DAIDS, NIAID, NIH

Data Manager: Kristine Coughlin

Frontier Science & Technology Research Foundation, Inc.

Field Representative: Joan Gottesman

Vanderbilt Therapeutics (VT) CRS

Immunologist: Alan Landay

Rush University CRS

Immunologist: Cara Wilson

University of Colorado Hospital CRS

Industry Representative: Paul Zuck

Merck Research Laboratories

Investigator: Karine Dube

UNC-CH Gillings School of Global Public Health

Investigator: Lynsay MacLaren Ehui

Whitman Walker Health CRS

Investigator: Margaret Fischl  
Miami Treatment and Prevention CTU

Investigator: Michael Keefer  
University of Rochester HIV/AIDS CTU

Investigator (unknown if current or past)  
Eugene Kroon  
Thai Red Cross AIDS Research Center Treatment (TRC-ARC Treatment) CRS

Investigator: Mark Pilkinton  
Vanderbilt CTU

Laboratory Data Manager (LDM): Madison Green  
Frontier Science & Technology Research Foundation, Inc.

Laboratory Data Manager (LDM): Kevin Knowles  
Frontier Science & Technology Research Foundation, Inc.

Laboratory Data Manager (LDM): Kyle Whitson  
Frontier Science & Technology Research Foundation, Inc.

Laboratory Specialist: Rose Lagattuta  
ACTG Laboratory Center at UCLA (ALC-UCLA)

Laboratory Technologist: Patricia Anthony  
USC Bishop Medical Teaching and Research Maternal Child Adolescent Virology Research Lab

Pharmacologist: Courtney Fletcher  
University of Nebraska Medical Center

Statistician: Evgenia Aga  
Statistical and Data Analysis Center  
Harvard School of Public Health

Statistician: Ronald Bosch  
Statistical and Data Analysis Center  
Harvard School of Public Health

Study Co-Chair: Jonathan Li  
Study Co-Chair: David Smith

Study Vice-Chair: Steven Deeks  
UCSF AIDS CRS  
University of California San Francisco General Hospital

Study Vice-Chair: Rajesh Gandhi  
Massachusetts General Hospital ACTG CRS

Virologist: John Mellors  
University of Pittsburgh CTU

## **Previous Team Members**

CSS Representative: Moses Nsubuga (Supercharger)  
Joint Clinical Research Centre (JCRC)/Kampala CRS

Clinical Trials Specialist: Evelyn Hogg  
ACTG Network Coordinating Center

DAIDS Medical Officer: Grace Chen  
National Institute of Allergy and Infectious Diseases (NIAID)  
DAIDS Medical Officer: Karin Klingman  
National Institute of Allergy and Infectious Diseases  
DAIDS/NIAID/NIH/HIVRB

Data Manager: Steven Bagley  
Frontier Science & Technology Research Foundation, Inc.

Data Manager: Jennifer Janik  
Frontier Science & Technology Research Foundation, Inc.

Data Manager: Mark Lojacono  
Frontier Science & Technology Research Foundation, Inc.

Data Manager: Thomas Miller  
Frontier Science & Technology Research Foundation, Inc.

Data Manager: Apsara Nair  
Frontier Science & Technology Research Foundation, Inc.

Data Manager: Aimee Willett  
Frontier Science & Technology Research Foundation, Inc.

Field Representative: Mary Adams  
University of Rochester Adult HIV Therapeutic Strategies Network CRS

International Program Specialist: Christina Blanchard-Horan  
ACTG Network Coordinating Center

International Program Specialist: Morgan Gapara  
ACTG Network Coordinating Center

International Program Specialist: Nefertari Johnson  
ACTG Network Coordinating Center

International Program Specialist: Ndeye (Fatou) Sow  
ACTG Network Coordinating Center

Investigator: Jintanat Ananworanich  
The Henry M. Jackson Foundation for the Advancement of Military Medicine

Laboratory Data Manager (LDM): Colleen Foley  
Frontier Science & Technology Research Foundation, Inc.

Laboratory Data Manager (LDM): Katelyn Hergott  
Frontier Science & Technology Research Foundation, Inc.

Laboratory Data Manager (LDM): Andrew Lohrum  
Frontier Science & Technology Research Foundation, Inc.

Laboratory Specialist: Kim Banks  
ACTG Network Coordinating Center  
Laboratory Technologist: David Shugarts  
University of Colorado Hospital CRS

Pharmacologist: Edward Acosta  
Alabama Therapeutics CRS

Virologist: Robert Coombs  
University of Washington AIDS CRS

## Supplemental Table 1. ART restart criteria

HIV-1 RNA at  $\geq 1,000$  copies/mL on two consecutive measurements

A single HIV-1 RNA  $\geq 1,000$  copies/mL and an average daily HIV-1 RNA rise of  $\geq 0.5$   $\log_{10}$  copies/mL based on the most recent two viral load measurements

A single HIV-1 RNA  $\geq 10,000$  copies/mL

CD4+ T-cell count  $< 250$  cells/ $\text{mm}^3$  on two consecutive measurements

CD4+ T-cell count  $< 50\%$  of the Step 1 entry CD4 count on two consecutive measurements

Clinical progression to CDC Category B or C disease

Diagnosis of Acute Retroviral Syndrome (ARS)

Pregnancy

Re-initiation of ART requested by participant or health care provider

**Supplemental Table 2: Demographics for the A5345 study population.**

|                                                                    | <b>Chronic-treated<br/>(N=33)</b> | <b>Early-treated<br/>(N=12)</b> |
|--------------------------------------------------------------------|-----------------------------------|---------------------------------|
| Age, median (Q1, Q3) years                                         | 46<br>(36, 53)                    | 38<br>(34, 47)                  |
| Sex, % male                                                        | 88%                               | 100%                            |
| Race/ethnicity, %                                                  |                                   |                                 |
| White                                                              | 73%                               | 8%                              |
| Black                                                              | 12%                               |                                 |
| Hispanic                                                           | 12%                               | 33%                             |
| Asian                                                              |                                   | 50%                             |
| Other                                                              | 3%                                | 8%                              |
| Nadir CD4, cells/mm <sup>3</sup>                                   |                                   |                                 |
| <200                                                               |                                   |                                 |
| 201-500                                                            | 82%                               | 83%                             |
| >500                                                               | 18%                               | 17%                             |
| Pre-ATI CD4, median (Q1, Q3) cells/mm <sup>3</sup>                 | 783<br>(651, 1028)                | 742<br>(654, 892)               |
| Pre-ART Viral Load, median (Q1, Q3)<br>log <sub>10</sub> copies/mL | 4.5<br>(4.0, 5.0)                 | 5.7<br>(4.8, 6.3)               |
| Duration of ART, median (Q1, Q3) years                             | 10.3<br>(6.1, 15.6)               | 3.9<br>(3.1, 4.8)               |

**Supplemental Table 3.** Features included in Partial least squares-discriminant analysis (PLS-DA) models.

| Features                                                       | Category | Features         | Category                           |
|----------------------------------------------------------------|----------|------------------|------------------------------------|
| CA-RNA                                                         | Viral    | HIV 1+2 Ab       | Antibody                           |
| CA-DNA                                                         | Viral    | HIV combo Ab     | Antibody                           |
| SCA                                                            | Viral    | LAg-Avidity      | Antibody                           |
| IUPM                                                           | Viral    | IFN- $\beta$     | Cytokine/chemokine                 |
| CA-RNA/CA-DNA ratio                                            | Viral    | IFN- $\gamma$    | Cytokine/chemokine                 |
| Baseline CD4                                                   | Cellular | IL-10            | Cytokine/chemokine                 |
| Baseline CD8                                                   | Cellular | IL-13            | Cytokine/chemokine                 |
| Baseline CD4/CD8 ratio                                         | Cellular | IL-15            | Cytokine/chemokine                 |
| Nadir CD4 cell count                                           | Cellular | IL-1 $\beta$     | Cytokine/chemokine                 |
| %CD38+HLADR+ CD4+ T-cells                                      | Cellular | IL-21            | Cytokine/chemokine                 |
| %CD38+HLADR+ CD8+ T-cells                                      | Cellular | IL-33            | Cytokine/chemokine                 |
| %CD45RA-CCR7+ (Central Memory) CD4+ T-cells                    | Cellular | IL-6             | Cytokine/chemokine                 |
| %CD45RA-CCR7+ (Central Memory) CD8+ T-cells                    | Cellular | TNF- $\alpha$    | Cytokine/chemokine                 |
| %CD45RA+CCR7- (Terminally Differentiated) CD4+ T-cells         | Cellular | Fractalkine      | Cytokine/chemokine                 |
| %CD45RA+CCR7- (Terminally Differentiated) CD8+ T-cells         | Cellular | IFN- $\alpha$ 2a | Cytokine/chemokine                 |
| %CD45RA-CCR7- (Effector Memory) CD4+ T-cells                   | Cellular | IL-12p70         | Cytokine/chemokine                 |
| %CD45RA-CCR7- (Effector Memory) CD8+ T-cells                   | Cellular | IL-2             | Cytokine/chemokine                 |
| %CD45RA+CCR7+ (Naive) CD4+ T-cells                             | Cellular | IL-22            | Cytokine/chemokine                 |
| %CD45RA+CCR7+ (Naive) CD8+ T-cells                             | Cellular | IL-23            | Cytokine/chemokine                 |
| %CD73+CD160+ CD4+ T-cells                                      | Cellular | IP-10            | Cytokine/chemokine                 |
| %CD73+CD160+ CD8+ T-cells                                      | Cellular | MCP-2            | Cytokine/chemokine                 |
| %CD160+PD1+ CD4+ T-cells                                       | Cellular | MIP-1 $\alpha$   | Cytokine/chemokine                 |
| %CD160+PD1+ CD8+ T-cells                                       | Cellular | SDF-1a           | Cytokine/chemokine                 |
| %CD160+ CD4+ T-cells                                           | Cellular | LBP              | Microbial translocation            |
| %CD160+ CD8+ T-cells                                           | Cellular | sCD14            | Immune activation/<br>inflammation |
| %CD73+ CD4+ T-cells                                            | Cellular | sCD163           | Immune activation/<br>inflammation |
| %CD73+ CD8+ T-cells                                            | Cellular | b-glucan         | Microbial translocation            |
| %LAG3+PD1+ CD4+ T-cells                                        | Cellular | Gal-3            | Immunomodulatory lectin            |
| %LAG3+PD1+ CD8+ T-cells                                        | Cellular | Gal-9            | Immunomodulatory lectin            |
| %LAG3+ CD4+ T-cells                                            | Cellular | E-selectin       | Immunomodulatory lectin            |
| %LAG3+ CD8+ T-cells                                            | Cellular |                  |                                    |
| %PD1+ CD4+ T-cells                                             | Cellular |                  |                                    |
| %PD1+ CD8+ T-cells                                             | Cellular |                  |                                    |
| %TIGIT+ CD4+ T-cells                                           | Cellular |                  |                                    |
| %TIGIT+ CD8+ T-cells                                           | Cellular |                  |                                    |
| %Tim3+ CD4+ T-cells                                            | Cellular |                  |                                    |
| %Tim3+ CD8+ T-cells                                            | Cellular |                  |                                    |
| %CD8 T-cells expressing CD107a<br>(summing the 3 HIV peptides) | Cellular |                  |                                    |
| %GAG-specific CD107a+ CD8+ T-cells                             | Cellular |                  |                                    |

**Supplemental Table 4: Demographics for the A5345 study population categorized by individuals with rapid (<4 weeks) versus slow ( $\geq$ 4 weeks) viral rebound.**

|                                                                    | <b>Rapid rebound<br/>(N=29)</b> | <b>Slow rebound<br/>(N=16)</b> |
|--------------------------------------------------------------------|---------------------------------|--------------------------------|
| Age, median (Q1, Q3) years                                         | 46<br>(35, 50)                  | 45<br>(35, 54)                 |
| Sex, % male                                                        | 90%                             | 94%                            |
| Race/ethnicity, %                                                  |                                 |                                |
| White                                                              | 62%                             | 44%                            |
| Black                                                              | 10%                             | 6%                             |
| Hispanic                                                           | 14%                             | 25%                            |
| Asian                                                              | 7%                              | 25%                            |
| Other                                                              | 7%                              | 0%                             |
| Nadir CD4, cells/mm <sup>3</sup>                                   |                                 |                                |
| <200                                                               |                                 |                                |
| 201-500                                                            | 83%                             | 81%                            |
| >500                                                               | 17%                             | 19%                            |
| Pre-ATI CD4, median (Q1, Q3) cells/mm <sup>3</sup>                 | 783<br>(651, 1028)              | 742<br>(654, 892)              |
| Pre-ART Viral Load, median (Q1, Q3)<br>log <sub>10</sub> copies/mL | 4.7<br>(4.0, 5.2)               | 4.6<br>(3.9, 5.8)              |
| Duration of ART, median (Q1, Q3) years                             | 7.1<br>(4.6, 12.5)              | 7.7<br>(3.8, 17.3)             |
| Early-treated, %                                                   | 21%                             | 38%                            |



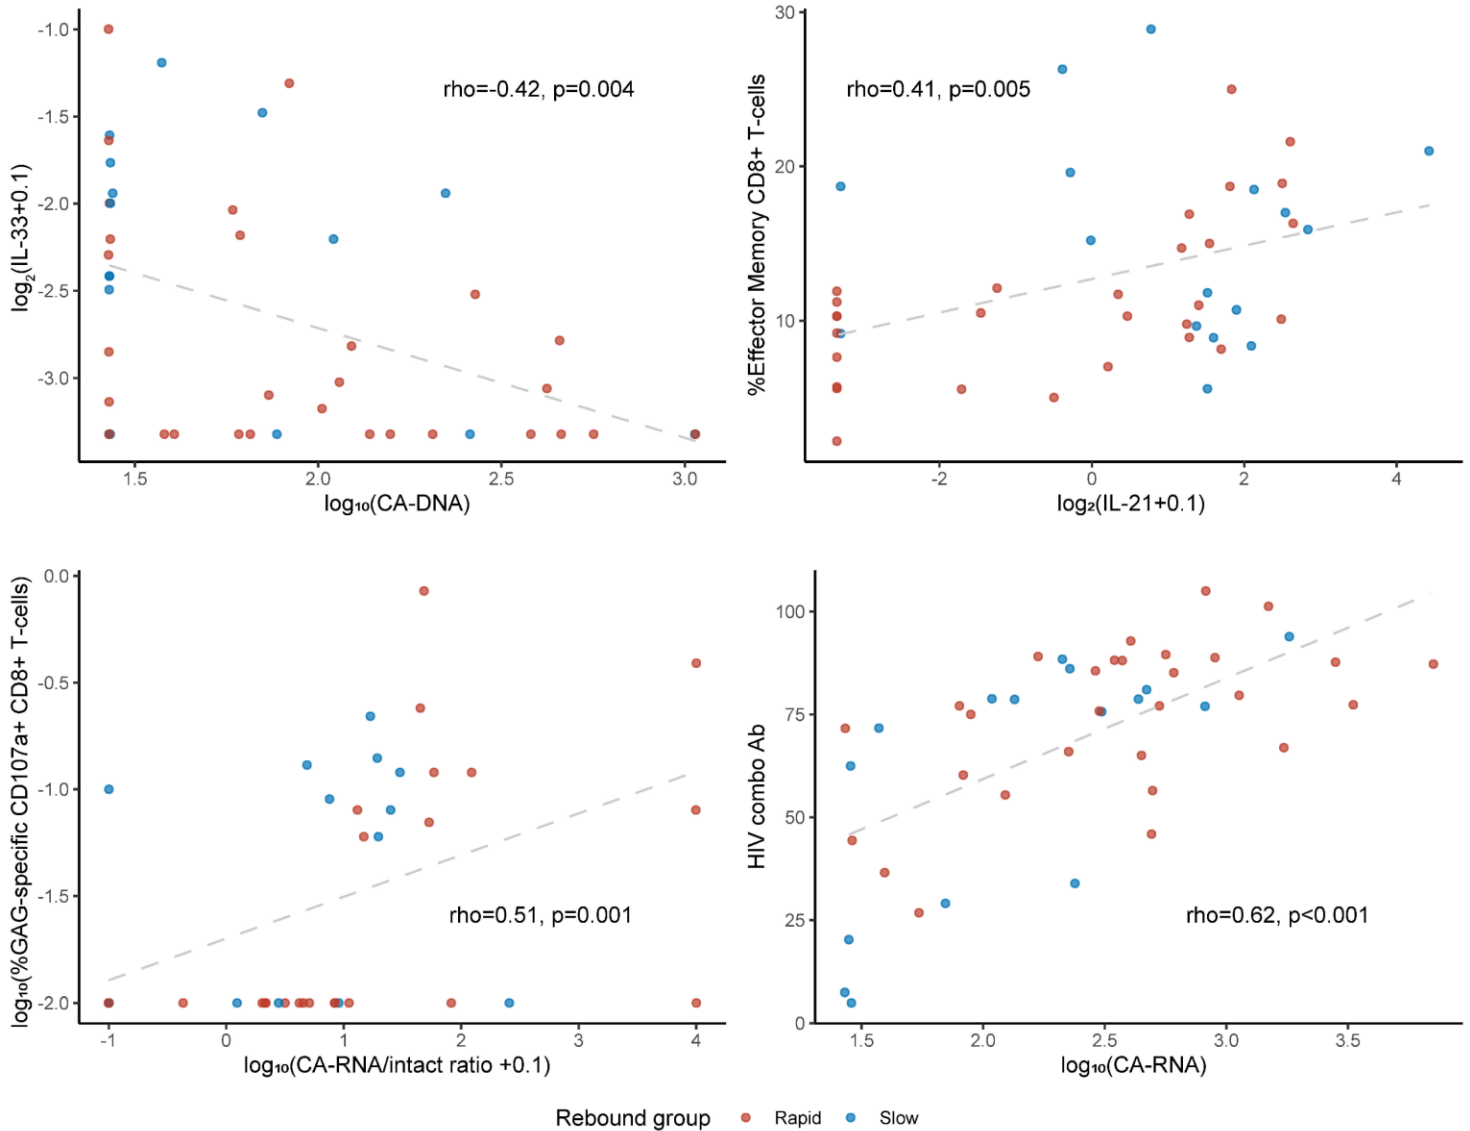

**Supplemental Figure 1: Examples of significant correlations between HIV reservoir, immune and inflammatory markers.** CA-DNA, total cell-associated HIV DNA; CA-RNA, unspliced cell-associated RNA. Red represents participants with HIV rebound <4 weeks and blue represents individuals with slow viral rebound ≥4 weeks.

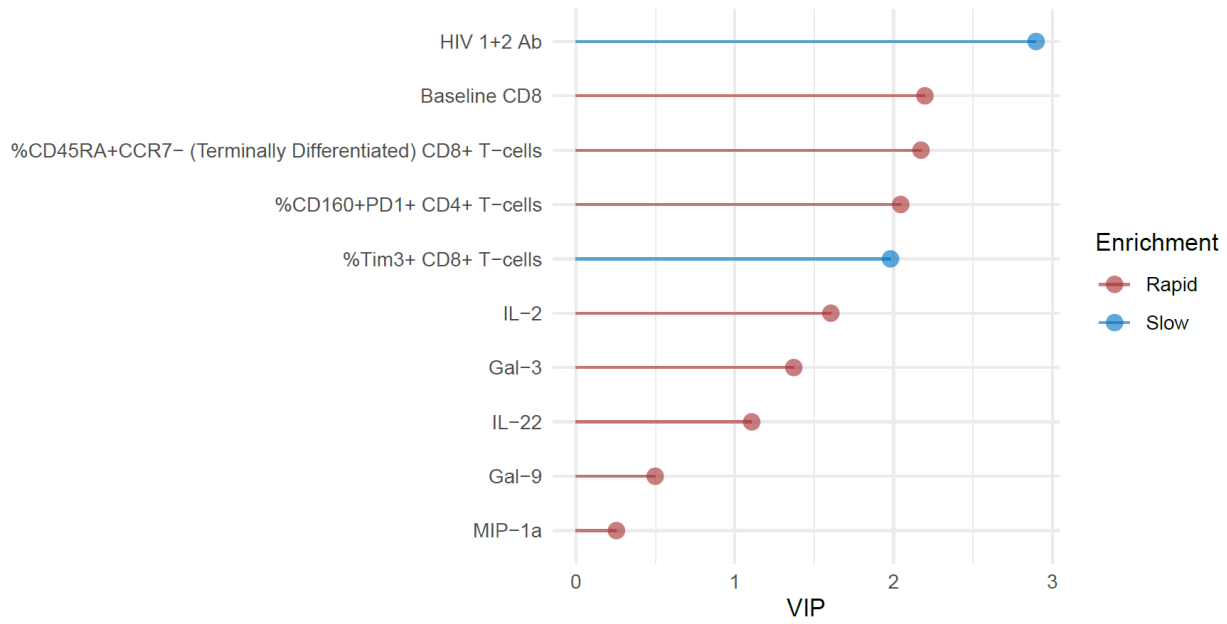

**Supplemental Figure 2:** Variable importance in projection (VIP) scores for selected features in the second component of chronically-treated participants.
